# Supplementary material
Source: MDPI journal article supplement (https://www.mdpi.com/2073-4352/13/4/692)
Supplement: s1 [file s1]

# Intrafibrillar growth of hydroxyapatite nanocrystals in multiscale collagen

Bingyu Xue<sup>1,2,3</sup>, Yidi Li<sup>4</sup>, Zhengyi Fu<sup>2,3</sup>, Hang Ping<sup>2,3,\*</sup> and Kun Wang<sup>1,2,\*</sup>

<sup>1</sup> State Key Laboratory of Silicate Materials for Architectures, Wuhan University of Technology, 122 Luoshi Road, Wuhan 430070, China; bingyu\_xue@whut.edu.cn

<sup>2</sup> Hubei Longzhong Laboratory, Xiangyang 441000, China; zyfu@whut.edu.cn

<sup>3</sup> State Key Laboratory of Advanced Technology for Materials Synthesis and Processing, Wuhan University of Technology, Wuhan 430070, China

<sup>4</sup> State Key Laboratory of Precision Blasting, Jiangnan University, Wuhan 430100, China; ydli@jhu.edu.cn

\* Correspondence: hping@whut.edu.cn or kun.wang@whut.edu.cn.

## Supplementary Information

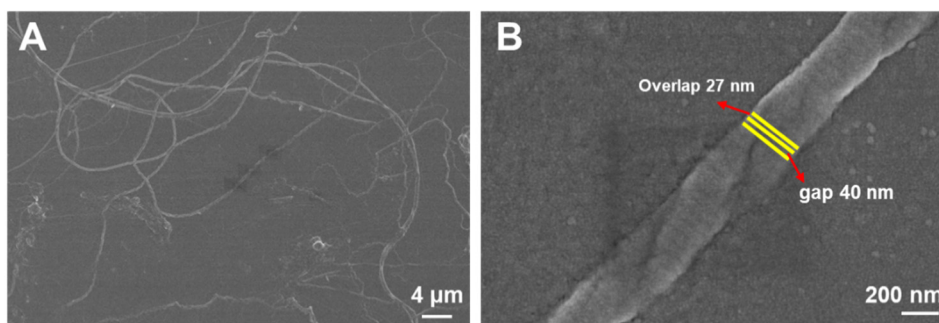

**Figure S1.** The original collagen fibril.

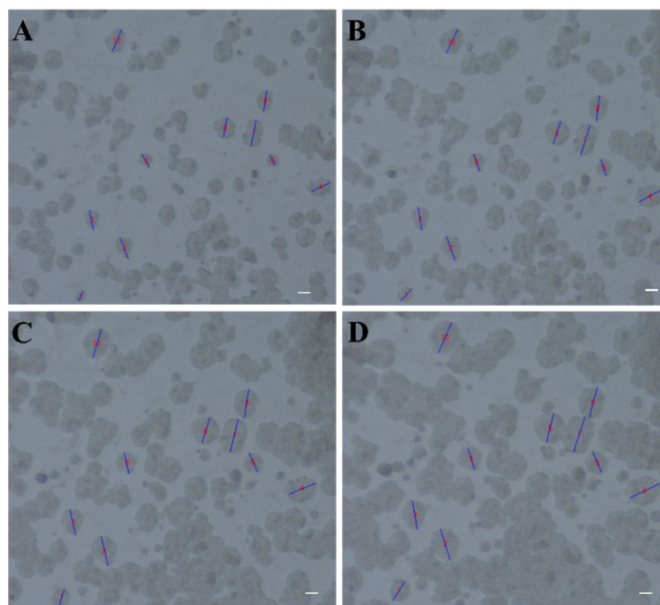

**Figure S2.** Monitoring of areas with HAP of film in the growth solution (50  $\mu\text{g/ml}$  PAA, pH 7.5), images(A-D) were taken at 120 min, 150 min, 180 min, and 210 min, respectively (scale bar 20 $\mu\text{m}$ ).

**Table S1** The size ( $\mu\text{m}$ ) of selected areas of film in the solution (50  $\mu\text{g/ml}$  PAA, pH 7.5), data were collected at 120 min, 150 min, 180 min, and 210 min, respectively

|        | 1     | 2     | 3     | 4     | 5     | 6     | 7     | 8     | 9     | 10    |
|--------|-------|-------|-------|-------|-------|-------|-------|-------|-------|-------|
| 120min | 17.36 | 37.2  | 33.11 | 34.04 | 20.14 | 33.11 | 44.27 | 35.07 | 25.04 | 38.95 |
| 150min | 25.87 | 44.12 | 39.43 | 47.82 | 30.01 | 40.02 | 51.72 | 41.01 | 33.59 | 47.97 |
| 180min | 32.44 | 50.84 | 45.85 | 56.28 | 35.01 | 46.37 | 56.85 | 48.04 | 37.61 | 51.91 |
| 210min | 40.61 | 58.61 | 54.97 | 67.9  | 44.02 | 55.32 | 67.64 | 55.18 | 44.82 | 61.65 |

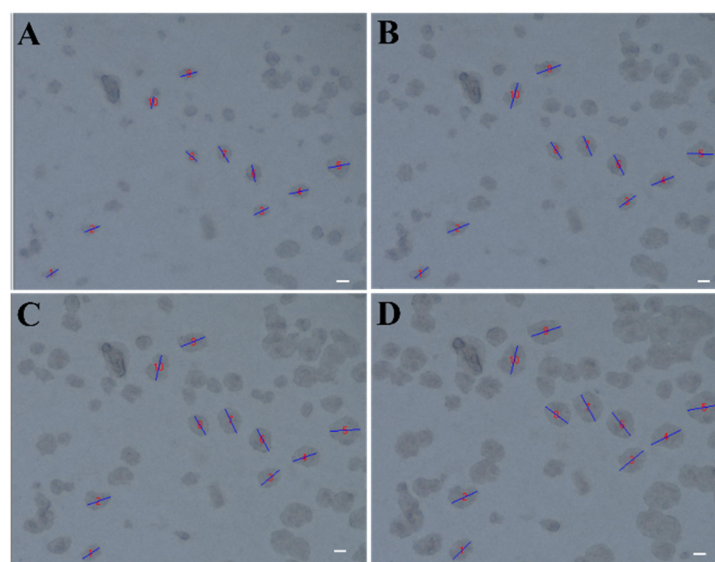

**Figure S3.** Monitoring of areas with HAP of film in the growth solution (**100 µg/ml PAA, pH 8.0**), images(A-D) were taken at 120 min, 150 min, 180 min, and 210 min, respectively (scale bar 20µm).

**Table S2** The size (µm) of selected areas of film in the solution (**100 µg/ml PAA, pH 8.0**), data were collected at 120 min, 150 min, 180 min, and 210 min, respectively

|        | 1     | 2     | 3     | 4     | 5     | 6     | 7     | 8     | 9     | 10    |
|--------|-------|-------|-------|-------|-------|-------|-------|-------|-------|-------|
| 120min | 19.89 | 22.46 | 21.71 | 27.12 | 29.99 | 23.23 | 26.32 | 21.35 | 23.64 | 17.18 |
| 150min | 27.33 | 29.1  | 26.48 | 30.91 | 34.34 | 27.89 | 31.68 | 26.66 | 31.91 | 32.3  |
| 180min | 34.06 | 35.44 | 33.41 | 37.6  | 39.62 | 33.66 | 35.06 | 31.35 | 38.01 | 35.11 |
| 210min | 36.49 | 39.15 | 39.77 | 41.00 | 43.54 | 39.21 | 39.17 | 37.97 | 42.86 | 41.63 |

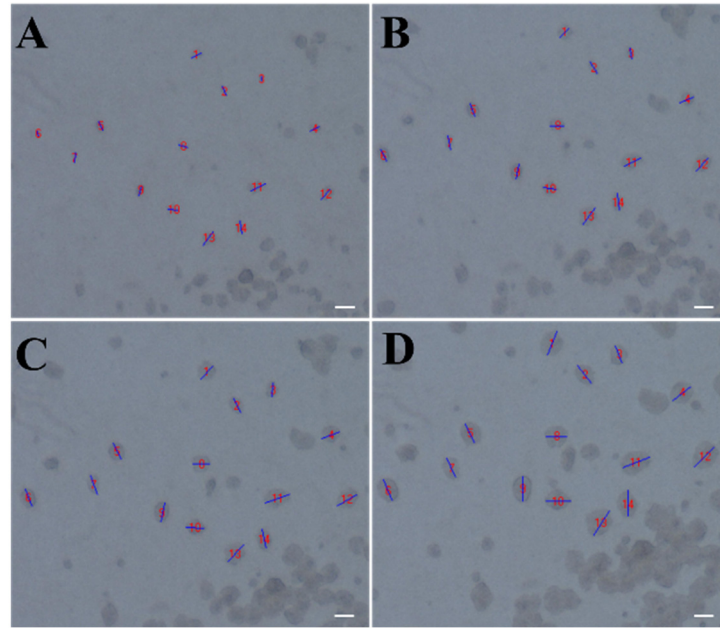

**Figure S4.** Monitoring of areas with HAP of film in the growth solution (100µg/ml PAA, pH 7.5), images(A-D) were taken at 120 min, 150 min, 180 min, and 210 min, respectively (scale bar 20µm).

**Table S3** The size (µm) of selected areas of film in the solution (100 µg/ml PAA, pH 7.5), data were collected at 120 min, 150 min, 180 min, and 210 min, respectively

|     | 1   | 2   | 3   | 4   | 5   | 6   | 7   | 8   | 9   | 10  | 11  | 12  | 13  | 14  |
|-----|-----|-----|-----|-----|-----|-----|-----|-----|-----|-----|-----|-----|-----|-----|
| 120 | 13. | 11. | 5.6 | 12. | 11. | 6.6 | 11. | 11. | 10. | 11. | 18. | 15. | 19. | 15. |
| min | 83  | 44  | 5   | 38  | 91  | 5   | 88  | 05  | 9   | 9   | 88  | 98  | 74  | 41  |
| 150 | 15. | 16. | 13. | 18. | 16. | 16. | 16. | 17. | 18. | 16. | 23. | 21. | 24. | 20  |
| min | 84  | 47  | 58  | 09  | 58  | 56  | 8   | 35  | 51  | 11  | 03  | 58  | 75  |     |
| 180 | 20. | 21. | 17. | 21. | 20. | 22. | 21. | 17. | 22. | 21. | 29. | 25. | 23. | 22. |
| min | 83  | 17  | 79  | 61  | 24  | 33  | 85  | 79  | 68  | 14  | 84  | 16  | 93  | 8   |
| 210 | 29. | 25. | 21. | 26. | 23. | 25. | 23. | 23. | 28. | 27. | 32. | 31. | 33. | 29. |
| min | 27  | 97  | 19  | 19  | 82  | 8   | 83  | 38  | 08  | 7   | 13  | 81  | 34  | 51  |

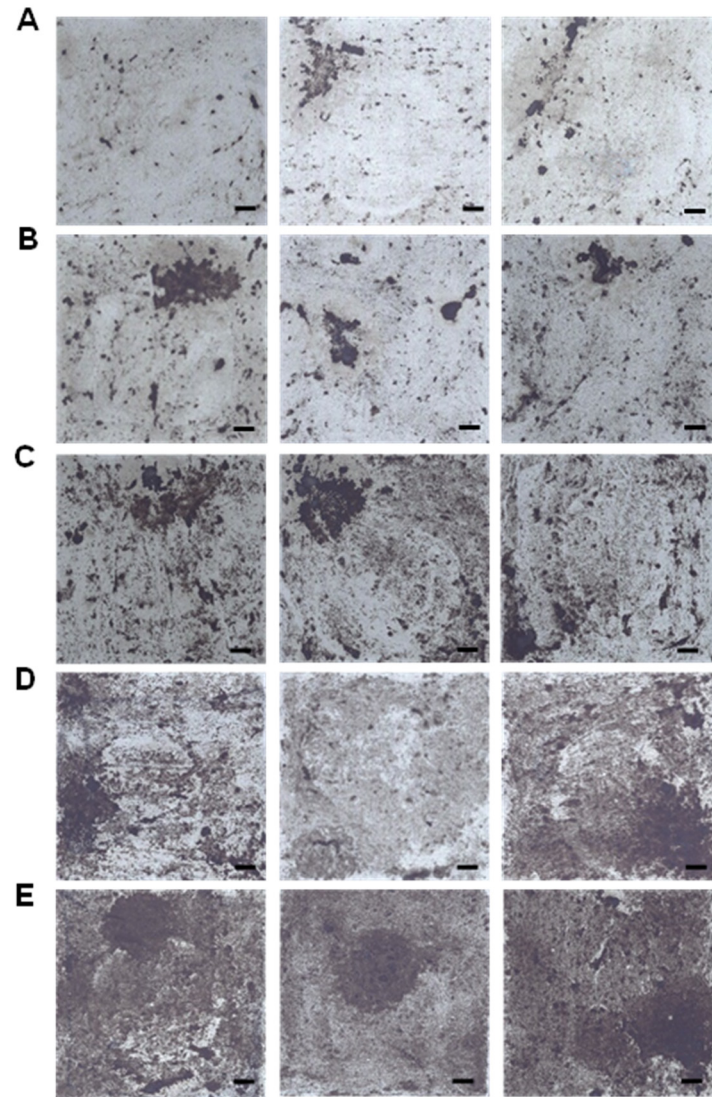

**Figure S5.** The collagen films reacted in the solution of different conditions, three experiments were conducted under each condition of solution. (A) The condition of solution of 150  $\mu\text{g/ml}$  PAA, pH 7.5, (B) the condition of solution of 150  $\mu\text{g/ml}$  PAA, pH 8.0, (C) the condition of solution of 100  $\mu\text{g/ml}$  PAA, pH 7.5, (D) the condition of solution of 100  $\mu\text{g/ml}$  PAA, pH 8, (E) the condition of solution of 50  $\mu\text{g/ml}$  PAA, pH 7.5

**Table S4** the growth area ratio of each specimen in Fig. S5.

|                                  | Specimen 1 | Specimen 2 | Specimen 3 |
|----------------------------------|------------|------------|------------|
| 150 $\mu\text{g/ml}$ PAA, pH 7.5 | 6.1%       | 8.5%       | 7.3%       |
| 150 $\mu\text{g/ml}$ PAA, pH 8.0 | 14.9%      | 14.7%      | 10.3%      |
| 100 $\mu\text{g/ml}$ PAA, pH 7.5 | 30.9%      | 38%        | 28.7%      |
| 100 $\mu\text{g/ml}$ PAA, pH 8.0 | 49.61%     | 46.4%      | 59.3%      |
| 50 $\mu\text{g/ml}$ PAA, pH 7.5  | 73.8%      | 76.2%      | 82.4%      |

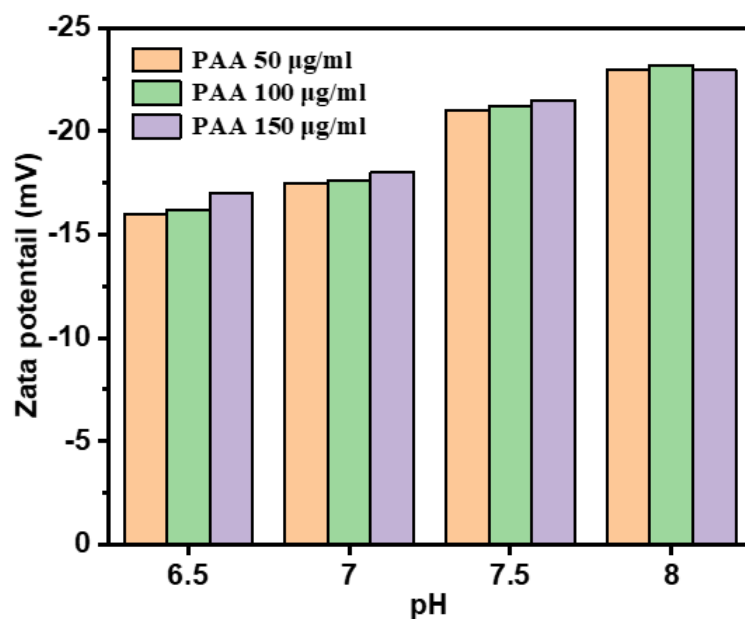

**Figure S6.** Zeta potential of precursors in different growth solutions.

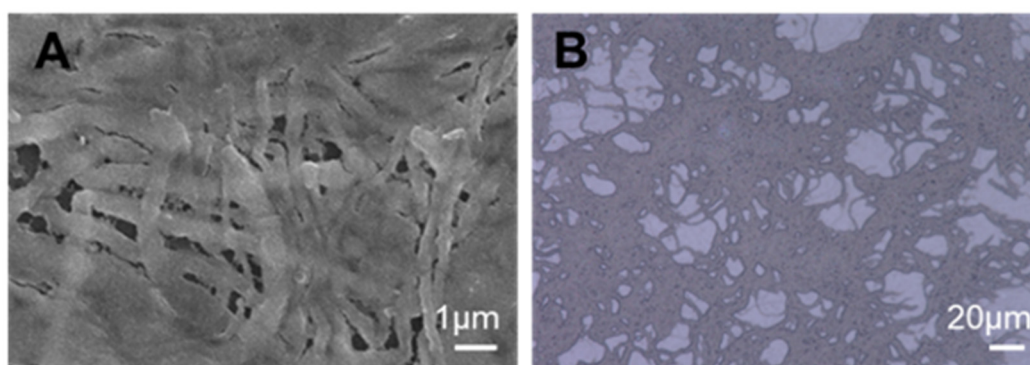

**Figure S7.** The extrafibrillar growth of HAP of the films in a growth solution of 50 µg/ml PAA, pH 8. (A) The SEM image. (B) The optical image.
